# Supplementary material for: Prospective application of a bleeding and ischemic risks-adjusted antithrombotic protocol in elderly patients revascularized with everolimus-eluting stents: EPIC05-Sierra75 study
Source: PubMed Central journal article supplement — J Geriatr Cardiol. 2022 May 28;19(5):354–66. doi: 10.11909/j.issn.1671-5411.2022.05.009 (PMC9170906; doi:10.11909/j.issn.1671-5411.2022.05.009), 2022-05-28
Supplement: jgc-19-5-354-S1.pdf [file jgc-19-5-354-S1.pdf]

**Table 1S Clinical characteristics in unmatched groups.**

|                                        | <b>SIERRA-75<br/>N = 1064</b> | <b>Control<br/>N = 730</b> | <b>P</b> | <b>95% CI</b>     |
|----------------------------------------|-------------------------------|----------------------------|----------|-------------------|
| Age                                    | 80.8 ± 4.2                    | 80.75 ± 4.5                | 0.8      | -0.45% to 0.35%   |
| Women                                  | 389 (36.6%)                   | 245 (33.5%)                | 0.18     | -1.4 to 7.5%      |
| BMI                                    | 27.4 ± 4                      | 27.1 ± 4                   | 0.12     | -0.68% to 0.08%   |
| Diabetes                               | 462 (43.4%)                   | 288 (39.4%)                | 0.11     | -0.65% to 8.6%    |
| Diabetes insulin-treated               | 106 (10%)                     | 60 (8.2%)                  | 0.2      | -0.97% to 4.4%    |
| Hypertension                           | 885 (83.2%)                   | 584 (80%)                  | 0.08     | -0.42% to 6.9%    |
| Dyslipidemia                           | 664 (62.4%)                   | 415 (56.8%)                | 0.02     | 0.99% to 10.2%    |
| Smoker                                 | 71 (6.6%)                     | 51 (7%)                    | 0.7      | -1.9% to 2.9%     |
| Previous MI                            | 213 (20%)                     | 153 (20.9%)                | 0.6      | -0.29% to 4.7%    |
| Previous stroke                        | 90 (8.4%)                     | 80 (11%)                   | 0.06     | -0.16% to 5.5%    |
| Previous PCI                           | 234 (22%)                     | 133 (18.2%)                | 0.05     | -0.004% to 7.57%  |
| Previous CABG                          | 31 (2.9%)                     | 29 (4%)                    | 0.21     | -0.6% to 2.99%    |
| Previous heart failure                 | 110 (10.3%)                   | 72 (9.8%)                  | 0.7      | -2.4% to 3.3%     |
| Previous major bleeding                | 51 (4.7%)                     | 50 (6.8%)                  | 0.06     | -0.06% to 4.4%    |
| Peripheral vasc. disease               | 96 (9%)                       | 66 (9%)                    | 1        | -2.6% to 2.8%     |
| GFR < 30 mL/min                        | 71 (6.7%)                     | 39 (5.3%)                  | 0.2      | -0.91% to 3.6%    |
| GFR 30-60 mL/min                       | 418 (39.3%)                   | 260 (35.6%)                | 0.12     | -0.9% to 8.2%     |
| Anemia                                 | 530 (49.8%)                   | 292 (40%)                  | 0.0001   | 5.1% to 14.4%     |
| PRECISE DAPT                           | 30.5 ± 11.4                   | 30.9 ± 11.6                | 0.52     | -0.68% to 1.54%   |
| CHA <sub>2</sub> DS <sub>2</sub> -VASc | 4.2 ± 1.2                     | 4.04 ± 1.3                 | 0.007    | -0.27% to -0.039% |
| HAS BLED                               | 2.7 ± 0.8                     | 2.51 ± 0.83                | 0.0001   | -0.27% to -0.11%  |
| GRACE score                            | 133 ± 26                      | 136 ± 23.5                 | 0.01     | 0.64% to 5.36%    |
| LVEF, %                                | 53 ± 12                       | 52.6 ± 11.4                | 0.45     | -1.5% to 0.71%    |
| NSTEMI                                 | 421 (39.6%)                   | 255 (34.9%)                | 0.04     | 0.14% to 9.2%     |
| STEMI                                  | 187 (17.6%)                   | 146 (20%)                  | 0.23     | -1.2% to 6.1%     |
| Unstable angina                        | 160 (15%)                     | 118 (16.1%)                | 0.50     | -2.2% to 4.59%    |
| ACS                                    | 757 (71.1%)                   | 515 (70.5%)                | 0.72     | -3.58% to 4.97%   |

Data are presented as mean ± SD or n (%). Anemia was defined as a hemoglobin value of less than 13 gm/dL in a man or less than 12 gm/dL in a woman. ACS: acute coronary syndrome; BMI: body mass index; CABG: coronary artery bypass grafting; GFR: glomerular filtration rate; LVEF: left ventricular ejection fraction; MI: myocardial infarction; NSTEMI: non-ST elevated myocardial infarction; PCI: percutaneous coronary intervention; STEMI: ST elevated myocardial infarction.

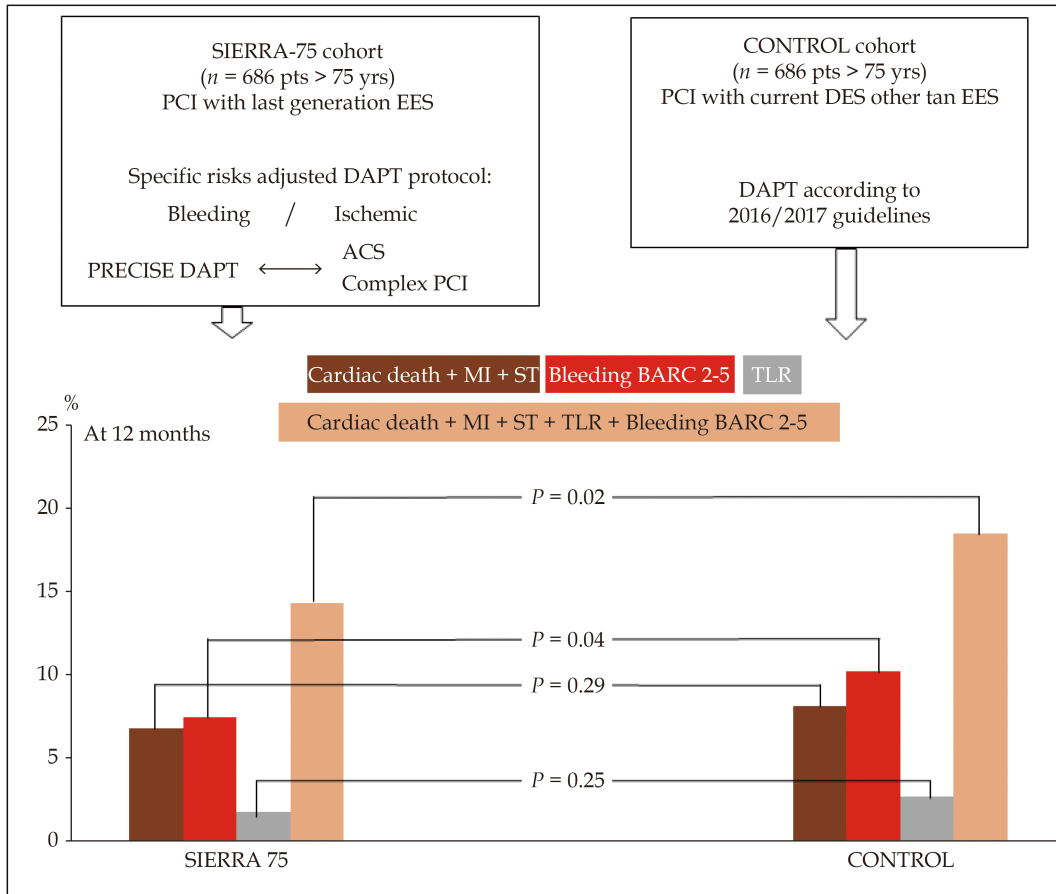

Figure 15 Central illustration.
